# Supplementary material for: Pressure-dependent kinetic analysis of the N2H3 potential energy surface
Source: Royal Society of Chemistry journal article supplement (doi:10.1039/d4cp03837a), 2025-01-01
Supplement: d4cp03837a1.pdf [file d4cp03837a1.pdf]

## Supporting Information for the paper:

# Pressure-Dependent Kinetic Analysis of the $\text{N}_2\text{H}_3$ Potential Energy Surface

Michal Keslin,<sup>a</sup> Kfir Kaplan,<sup>a</sup> Alon Grinberg Dana<sup>a,b,\*</sup>

<sup>a</sup>Wolfson Department of Chemical Engineering, Technion – Israel Institute of Technology, Haifa 3200003, Israel

<sup>b</sup>Grand Technion Energy Program (GTEP), Technion – Israel Institute of Technology, Haifa 3200003, Israel

\* Corresponding author, [alon@technion.ac.il](mailto:alon@technion.ac.il), +972-73-378-2117

**Table S1: Stationary points geometries, T1 diagnostic factors, and imaginary frequencies**

### H

|   |     |     |     |
|---|-----|-----|-----|
| H | 0.0 | 0.0 | 0.0 |
|---|-----|-----|-----|

T1: 0.000

### H2

|   |     |     |           |
|---|-----|-----|-----------|
| N | 0.0 | 0.0 | 0.370025  |
| N | 0.0 | 0.0 | -0.370025 |

T1: 0.012

### NH(T)

|   |     |     |           |
|---|-----|-----|-----------|
| N | 0.0 | 0.0 | 0.517943  |
| H | 0.0 | 0.0 | -0.517943 |

T1: 0.001

### NH2

|   |           |           |     |
|---|-----------|-----------|-----|
| N | 0.000243  | 0.423545  | 0.0 |
| H | -0.803589 | -0.211311 | 0.0 |
| H | 0.803346  | -0.212233 | 0.0 |

T1: 0.008

### NNH

|   |           |           |     |
|---|-----------|-----------|-----|
| N | -0.068575 | 0.378082  | 0.0 |
| N | 0.986118  | -0.134088 | 0.0 |
| H | -0.917543 | -0.243994 | 0.0 |

T1: 0.028

### t-N2H2

|   |           |          |           |
|---|-----------|----------|-----------|
| N | -0.931858 | 0.832107 | 0.099199  |
| N | -2.169692 | 0.773196 | 0.198571  |
| H | -0.564058 | 0.953315 | 1.053457  |
| H | -2.537492 | 0.651988 | -0.755687 |

T1: 0.013

### c-N2H2

|   |           |          |           |
|---|-----------|----------|-----------|
| N | -0.929170 | 0.795957 | 0.187094  |
| N | -2.167342 | 0.719494 | 0.120147  |
| H | -0.588361 | 1.770061 | 0.108282  |
| H | -2.614630 | 1.644930 | -0.001276 |

T1: 0.013

**H2NN (singlet ground state)**

|   |           |           |           |
|---|-----------|-----------|-----------|
| N | -0.013141 | 0.002511  | 0.243320  |
| N | 0.996077  | -0.190324 | -0.402690 |
| H | -0.476744 | -0.727921 | 0.817821  |
| H | -0.506192 | 0.915734  | 0.281183  |

T1: 0.021

**N2H3**

|   |             |             |             |
|---|-------------|-------------|-------------|
| N | -0.42601000 | 0.00115600  | 0.16689800  |
| N | 0.78971200  | -0.52568500 | -0.07952700 |
| H | -1.18466200 | -0.64524000 | 0.02933400  |
| H | -0.63000700 | 0.95835800  | -0.08318900 |
| H | 1.43579600  | 0.26241300  | -0.11407100 |

T1: 0.025

**NH3N**

|   |             |             |             |
|---|-------------|-------------|-------------|
| N | 0.57094400  | 0.08681900  | 0.23479400  |
| N | -0.76477000 | -0.11923400 | -0.32402800 |
| H | 1.15355600  | -0.75758500 | 0.25268100  |
| H | 1.10749800  | 0.83184500  | -0.22327000 |
| H | 0.43969400  | 0.37381600  | 1.20592600  |

T1: 0.012

**TS1**

|   |             |             |             |
|---|-------------|-------------|-------------|
| N | -1.67916600 | 0.79698300  | 0.31258100  |
| N | -3.09387500 | 0.62346800  | -0.19402200 |
| H | -1.08647400 | -0.02924200 | 0.32317000  |
| H | -1.21076700 | 1.63678400  | -0.00600500 |
| H | -2.54915800 | 1.14727500  | 0.93756800  |

imaginary frequency: 1847.05i, cm<sup>-1</sup>

T1: 0.025

**TS2**

|   |             |             |             |
|---|-------------|-------------|-------------|
| N | -1.38277000 | 0.40793700  | 0.39052800  |
| N | -2.34834600 | 0.59978700  | -0.36233900 |
| H | 0.34120000  | -0.19564900 | -0.27706100 |
| H | -1.09722000 | 1.24501300  | 0.92502600  |
| H | -2.69456300 | 1.57243300  | -0.31578900 |

imaginary frequency: 600.52i, cm<sup>-1</sup>

T1: 0.020

**TS3**

|   |             |             |             |
|---|-------------|-------------|-------------|
| N | -0.43791500 | -0.22586100 | -0.11221200 |
| N | -1.61889500 | -0.45151800 | 0.19390800  |
| H | 0.12795300  | -1.02752300 | 0.19605400  |
| H | 0.61674800  | 1.31230600  | 0.56814000  |
| H | -2.17138400 | 0.36078300  | -0.11336200 |

imaginary frequency: 532.85i, cm<sup>-1</sup>

T1: 0.021

**TS4**

|   |             |             |             |
|---|-------------|-------------|-------------|
| N | -0.60800700 | 0.03978500  | -0.16074000 |
| N | 0.61952900  | -0.11674200 | 0.07234400  |
| H | -0.99753300 | 0.92573400  | -0.50236100 |
| H | -1.17909400 | -0.77645100 | -0.44304200 |
| H | -1.61830500 | -0.04293700 | 1.06002000  |

imaginary frequency: 1055.85i, cm<sup>-1</sup>

T1: 0.047

**TS5**

|   |             |             |             |
|---|-------------|-------------|-------------|
| N | -0.58266300 | 0.05787000  | -0.24618300 |
| N | 0.60266300  | -0.34927700 | -0.32619100 |
| H | -0.84406700 | 1.03663300  | -0.30014700 |
| H | -1.40009100 | -0.59029700 | -0.24930700 |
| H | -1.55925200 | -0.12553900 | 1.14804900  |

imaginary frequency: 1497.90i, cm<sup>-1</sup>  
T1: 0.088

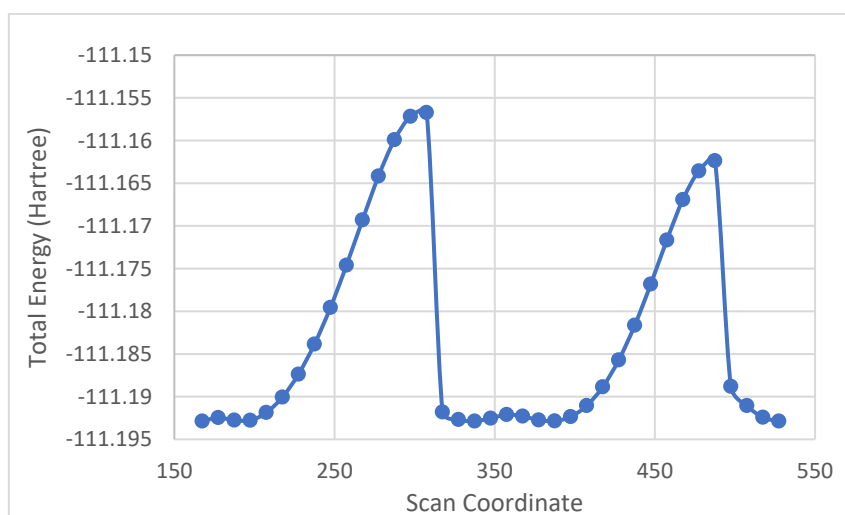

**Fig. S1:** Torsional scan of N<sub>2</sub>H<sub>3</sub> at a resolution of 10o at the B2PLYP-D3/aug-cc-pVTZ level.

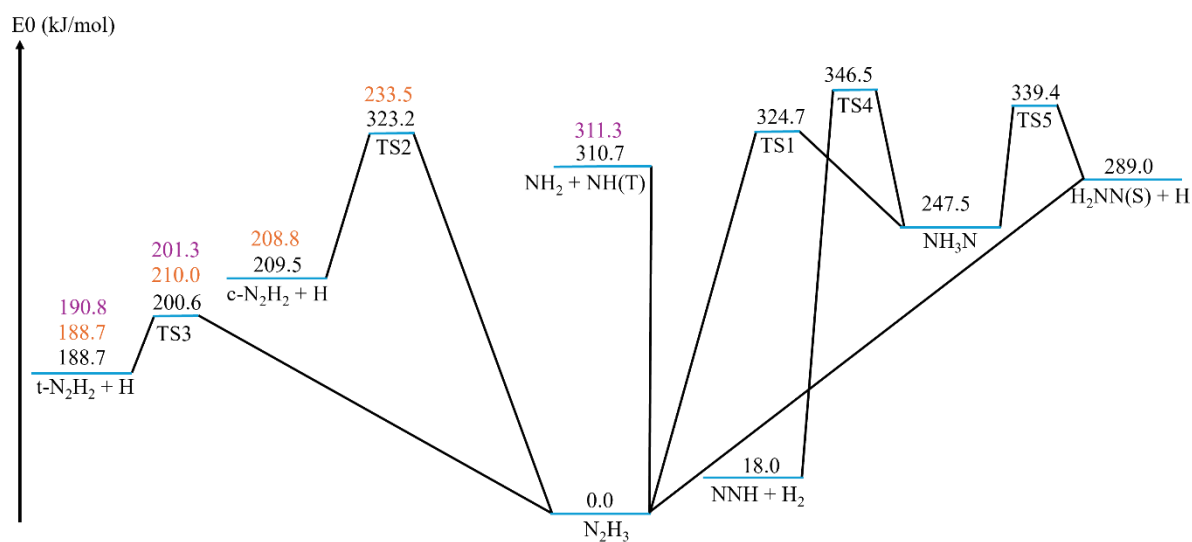

**Fig. S2:** Representation of the N<sub>2</sub>H<sub>3</sub> PES along with energy values from previous studies.  
In **black**: CCSD(T)-F12a/aug-cc-pVTZ-F12//B2PLYP-D3/aug-cc-pVTZ energies from the present work.  
In **orange**: CCSD(T)/CBS//MP2/6-311++G(3df,2p) energies by Raghunath et al.<sup>1</sup>  
In **purple**: RCCSD(T)/CBS//M06-2x-D3/aug-cc-pVTZ energies by Diévert and Catoire.<sup>2</sup>

**Table S2: NH<sub>3</sub>N Thermodynamic properties – Chemkin format**

|                 |                |                 |                 |                 |        |          |        |   |
|-----------------|----------------|-----------------|-----------------|-----------------|--------|----------|--------|---|
| NH3N            | H              | 3N              | 2               | G               | 10.000 | 3000.000 | 465.11 | 1 |
| 2.11875669E+00  | 1.19021497E-02 | -6.11171276E-06 | 1.57914494E-09  | -1.62692823E-13 |        |          |        | 2 |
| 5.57732688E+04  | 1.32966156E+01 | 4.05421786E+00  | -4.74258286E-03 | 4.75667970E-05  |        |          |        | 3 |
| -7.53589731E-08 | 4.11909655E-11 | 5.55932234E+04  | 5.44064039E+00  |                 |        |          |        | 4 |

**Table S3: NH<sub>3</sub>N Thermodynamic properties – Cantera format**

```
- name: NH3N
composition: {N: 2, H: 3}
thermo:
  model: NASA7
  temperature-ranges: [10.0, 465.11, 3000.0]
  data:
    - [2.11875669, 1.19021497e-02, -6.11171276e-06, 1.57914494e-09,
      -1.62692823e-13, 5.57732688e+04, 1.32966156e+01]
    - [4.05421786, -4.74258286e-03, 4.75667970e-05, -7.53589731e-08,
      4.11909655e-11, 5.55932234e+04, 5.44064039]
note: '[NH3+][N-]'
```

**Table S4: Computed rate coefficient – Chemkin format**

|                       |            |             |              |             |       |
|-----------------------|------------|-------------|--------------|-------------|-------|
| NH3N(+M)<=>N2H3(+M)   |            |             | 1.000e+00    | 0.000       | 0.000 |
| TCHEB/                | 300.000    | 3000.000 /  |              |             |       |
| PCHEB/                | 0.010      | 98.692 /    |              |             |       |
| CHEB/                 | 6 4/       |             |              |             |       |
| CHEB/                 | 3.164e+00  | 2.611e+00   | -1.125e-01   | -3.372e-02  | /     |
| CHEB/                 | 2.506e+00  | 1.029e+00   | 4.096e-02    | 1.749e-02   | /     |
| CHEB/                 | -4.339e-01 | 1.659e-01   | 6.194e-03    | -3.833e-03  | /     |
| CHEB/                 | -4.241e-01 | -1.835e-03  | 2.004e-02    | 5.784e-03   | /     |
| CHEB/                 | -1.475e-01 | -2.299e-04  | 3.740e-03    | 2.314e-03   | /     |
| CHEB/                 | -4.441e-02 | -1.830e-03  | -1.365e-03   | -6.690e-04  | /     |
| N2H3(+M)<=>N2H2+H(+M) |            |             | 1.000e+00    | 0.000       | 0.000 |
| TCHEB/                | 300.000    | 3000.000 /  |              |             |       |
| PCHEB/                | 0.010      | 98.692 /    |              |             |       |
| CHEB/                 | 6 4/       |             |              |             |       |
| CHEB/                 | -6.79362   | 0.813487    | -0.140865    | 0.0133607   | /     |
| CHEB/                 | 14.8198    | 0.820276    | 0.00147819   | -0.02546    | /     |
| CHEB/                 | -0.591313  | 0.239502    | 0.0625767    | -0.0016977  | /     |
| CHEB/                 | -0.304886  | 0.0320388   | 0.024277     | 0.00936021  | /     |
| CHEB/                 | -0.133801  | -0.0135305  | -2.01909e-06 | 0.00536465  | /     |
| CHEB/                 | -0.0490817 | -0.015718   | -0.00813631  | 0.00114971  | /     |
| N2H2+H(+M)<=>NH3N(+M) |            |             | 1.000e+00    | 0.000       | 0.000 |
| TCHEB/                | 300.000    | 3000.000 /  |              |             |       |
| PCHEB/                | 0.010      | 98.692 /    |              |             |       |
| CHEB/                 | 6 4/       |             |              |             |       |
| CHEB/                 | 1.67563    | 0.793494    | -0.109792    | -0.0300104  | /     |
| CHEB/                 | 6.80705    | 1.06652     | 0.0433188    | 0.0147008   | /     |
| CHEB/                 | -0.0113718 | 0.115021    | 0.0263406    | 0.00187797  | /     |
| CHEB/                 | -0.197575  | -0.0146724  | 0.020278     | 0.00686065  | /     |
| CHEB/                 | -0.0610285 | -0.00638315 | 0.00118585   | 0.000843304 | /     |
| CHEB/                 | -0.0236698 | -0.00743267 | -0.0014863   | -0.0004882  | /     |
| H2NN+H(+M)<=>N2H3(+M) |            |             | 1.000e+00    | 0.000       | 0.000 |
| TCHEB/                | 300.000    | 3000.000 /  |              |             |       |
| PCHEB/                | 0.010      | 98.692 /    |              |             |       |
| CHEB/                 | 6 4/       |             |              |             |       |
| CHEB/                 | 5.821e+00  | 1.705e+00   | -1.381e-01   | -4.379e-02  | /     |
| CHEB/                 | 2.382e+00  | 3.141e-01   | 1.258e-01    | 3.047e-02   | /     |
| CHEB/                 | -2.059e-01 | -2.399e-02  | 1.439e-02    | 1.323e-02   | /     |
| CHEB/                 | -1.624e-01 | 1.056e-02   | -8.142e-04   | -4.772e-05  | /     |
| CHEB/                 | -5.628e-02 | -8.414e-03  | -3.273e-03   | -1.149e-03  | /     |
| CHEB/                 | -1.345e-02 | -5.592e-03  | -3.047e-03   | -1.013e-03  | /     |
| NNH+H2(+M)<=>N2H3(+M) |            |             | 1.000e+00    | 0.000       | 0.000 |
| TCHEB/                | 300.000    | 3000.000 /  |              |             |       |
| PCHEB/                | 0.010      | 98.692 /    |              |             |       |
| CHEB/                 | 6 4/       |             |              |             |       |
| CHEB/                 | -2.210e+01 | 1.843e+00   | -9.439e-02   | -4.106e-02  | /     |
| CHEB/                 | 2.426e+01  | 1.492e-01   | 8.496e-02    | 3.371e-02   | /     |
| CHEB/                 | -2.280e-01 | 6.103e-03   | 8.998e-03    | 7.083e-03   | /     |
| CHEB/                 | -1.161e-01 | 5.985e-03   | 2.111e-03    | 4.435e-04   | /     |
| CHEB/                 | -3.306e-02 | -6.587e-03  | -3.227e-03   | -1.073e-03  | /     |
| CHEB/                 | -4.288e-03 | -3.689e-03  | -2.450e-03   | -1.089e-03  | /     |

|                       |            |            |            |            |       |
|-----------------------|------------|------------|------------|------------|-------|
| NH+NH2(+M)<=>N2H3(+M) |            |            | 1.000e+00  | 0.000      | 0.000 |
| TCHEB/                | 300.000    | 3000.000 / |            |            |       |
| PCHEB/                | 0.010      | 98.692 /   |            |            |       |
| CHEB/                 | 6 4/       |            |            |            |       |
| CHEB/                 | 1.090e+01  | 1.961e+00  | -2.649e-02 | -1.389e-02 | /     |
| CHEB/                 | -1.325e+00 | 4.625e-02  | 3.087e-02  | 1.595e-02  | /     |
| CHEB/                 | -4.545e-01 | -4.938e-03 | -2.977e-03 | -1.239e-03 | /     |
| CHEB/                 | -1.818e-01 | -1.975e-03 | -1.405e-03 | -8.063e-04 | /     |
| CHEB/                 | -6.686e-02 | -3.889e-04 | -2.866e-04 | -1.738e-04 | /     |
| CHEB/                 | -1.792e-02 | -9.773e-05 | -6.817e-05 | -3.804e-05 | /     |

|                       |            |            |            |            |       |
|-----------------------|------------|------------|------------|------------|-------|
| H2NN+H(+M)<=>NH3N(+M) |            |            | 1.000e+00  | 0.000      | 0.000 |
| TCHEB/                | 300.000    | 3000.000 / |            |            |       |
| PCHEB/                | 0.010      | 98.692 /   |            |            |       |
| CHEB/                 | 6 4/       |            |            |            |       |
| CHEB/                 | 7.467e+00  | 1.487e+00  | -1.169e-01 | -2.180e-02 | /     |
| CHEB/                 | 2.226e+00  | 5.912e-01  | 7.743e-02  | -3.233e-03 | /     |
| CHEB/                 | -4.627e-02 | -8.839e-02 | 3.780e-02  | 2.130e-02  | /     |
| CHEB/                 | -1.709e-01 | 1.987e-03  | 4.007e-03  | 3.344e-03  | /     |
| CHEB/                 | -5.896e-02 | 7.181e-03  | -5.347e-03 | -1.484e-03 | /     |
| CHEB/                 | -6.750e-03 | -8.141e-03 | -3.261e-03 | -8.599e-04 | /     |

|                       |            |            |            |            |       |
|-----------------------|------------|------------|------------|------------|-------|
| NNH+H2(+M)<=>NH3N(+M) |            |            | 1.000e+00  | 0.000      | 0.000 |
| TCHEB/                | 300.000    | 3000.000 / |            |            |       |
| PCHEB/                | 0.010      | 98.692 /   |            |            |       |
| CHEB/                 | 6 4/       |            |            |            |       |
| CHEB/                 | -2.080e+01 | 1.795e+00  | -8.408e-02 | -3.411e-02 | /     |
| CHEB/                 | 2.449e+01  | 2.239e-01  | 6.259e-02  | 2.163e-02  | /     |
| CHEB/                 | -1.125e-01 | -4.429e-02 | 2.254e-02  | 1.153e-02  | /     |
| CHEB/                 | -1.414e-01 | 3.668e-02  | -1.935e-03 | 6.527e-04  | /     |
| CHEB/                 | -1.613e-02 | -1.571e-02 | 9.475e-06  | -6.765e-04 | /     |
| CHEB/                 | 1.945e-04  | -2.247e-03 | -3.329e-03 | -1.060e-03 | /     |

|                       |            |            |            |            |       |
|-----------------------|------------|------------|------------|------------|-------|
| NH2+NH(+M)<=>NH3N(+M) |            |            | 1.000e+00  | 0.000      | 0.000 |
| TCHEB/                | 300.000    | 3000.000 / |            |            |       |
| PCHEB/                | 0.010      | 98.692 /   |            |            |       |
| CHEB/                 | 6 4/       |            |            |            |       |
| CHEB/                 | 7.426e+00  | 1.583e+00  | -1.843e-01 | -4.141e-02 | /     |
| CHEB/                 | -3.808e-02 | 4.111e-01  | 1.648e-01  | 2.562e-02  | /     |
| CHEB/                 | -1.474e-01 | 2.517e-02  | 2.471e-02  | 1.332e-02  | /     |
| CHEB/                 | -9.065e-02 | -8.933e-03 | -9.601e-04 | 2.422e-03  | /     |
| CHEB/                 | -2.653e-02 | -1.214e-02 | -5.249e-03 | -6.964e-04 | /     |
| CHEB/                 | 3.962e-05  | -7.445e-03 | -3.825e-03 | -1.081e-03 | /     |

|                         |            |            |            |            |       |
|-------------------------|------------|------------|------------|------------|-------|
| H2NN+H(+M)<=>N2H2+H(+M) |            |            | 1.000e+00  | 0.000      | 0.000 |
| TCHEB/                  | 300.000    | 3000.000 / |            |            |       |
| PCHEB/                  | 0.010      | 98.692 /   |            |            |       |
| CHEB/                   | 6 4/       |            |            |            |       |
| CHEB/                   | 7.467e+00  | 1.487e+00  | -1.169e-01 | -2.180e-02 | /     |
| CHEB/                   | 2.226e+00  | 5.912e-01  | 7.743e-02  | -3.233e-03 | /     |
| CHEB/                   | -4.627e-02 | -8.839e-02 | 3.780e-02  | 2.130e-02  | /     |
| CHEB/                   | -1.709e-01 | 1.987e-03  | 4.007e-03  | 3.344e-03  | /     |
| CHEB/                   | -5.896e-02 | 7.181e-03  | -5.347e-03 | -1.484e-03 | /     |
| CHEB/                   | -6.750e-03 | -8.141e-03 | -3.261e-03 | -8.599e-04 | /     |

NNH+H2(+M)<=>N2H2+H(+M) 1.000e+00 0.000 0.000  
 TCHEB/ 300.000 3000.000 /  
 PCHEB/ 0.010 98.692 /  
 CHEB/ 6 4/  
 CHEB/ 13.8669 -0.0377532 -0.025426 -0.0133332 /  
 CHEB/ -0.177674 0.0454564 0.0303814 0.0157223 /  
 CHEB/ -0.0291851 -0.00552477 -0.00338661 -0.00147392 /  
 CHEB/ -0.0104781 -0.00209585 -0.00149409 -0.000860035 /  
 CHEB/ -0.00357322 -0.000355265 -0.000264803 -0.000161025 /  
 CHEB/ -0.000780331 -4.76315e-05 -3.3424e-05 -1.82459e-05 /

NH2+NH(+M)<=>N2H2+H(+M) 1.000e+00 0.000 0.000  
 TCHEB/ 300.000 3000.000 /  
 PCHEB/ 0.010 98.692 /  
 CHEB/ 6 4/  
 CHEB/ 13.8669 -0.0377532 -0.025426 -0.0133332 /  
 CHEB/ -0.177674 0.0454564 0.0303814 0.0157223 /  
 CHEB/ -0.0291851 -0.00552477 -0.00338661 -0.00147392 /  
 CHEB/ -0.0104781 -0.00209585 -0.00149409 -0.000860035 /  
 CHEB/ -0.00357322 -0.000355265 -0.000264803 -0.000161025 /  
 CHEB/ -0.000780331 -4.76315e-05 -3.3424e-05 -1.82459e-05 /

NNH+H2(+M)<=>H2NN+H(+M) 1.000e+00 0.000 0.000  
 TCHEB/ 300.000 3000.000 /  
 PCHEB/ 0.010 98.692 /  
 CHEB/ 6 4/  
 CHEB/ -1.947e+01 -9.609e-02 -6.061e-02 -2.818e-02 /  
 CHEB/ 2.586e+01 9.336e-02 5.761e-02 2.559e-02 /  
 CHEB/ 2.971e-01 9.757e-03 7.330e-03 4.474e-03 /  
 CHEB/ 1.007e-01 -2.454e-03 -1.454e-03 -5.604e-04 /  
 CHEB/ 3.661e-02 -5.101e-03 -3.167e-03 -1.426e-03 /  
 CHEB/ 1.424e-02 -2.476e-03 -1.622e-03 -8.077e-04 /

NH2+NH(+M)<=>H2NN+H(+M) 1.000e+00 0.000 0.000  
 TCHEB/ 300.000 3000.000 /  
 PCHEB/ 0.010 98.692 /  
 CHEB/ 6 4/  
 CHEB/ 8.088e+00 -1.695e-01 -9.938e-02 -4.034e-02 /  
 CHEB/ 2.014e+00 1.866e-01 1.054e-01 3.945e-02 /  
 CHEB/ 3.156e-01 -6.226e-03 1.036e-03 4.135e-03 /  
 CHEB/ 9.155e-02 -5.777e-03 -3.929e-03 -1.781e-03 /  
 CHEB/ 2.888e-02 -6.283e-03 -3.772e-03 -1.634e-03 /  
 CHEB/ 8.379e-03 -2.481e-03 -1.645e-03 -8.323e-04 /

NH2+NH(+M)<=>NNH+H2(+M) 1.000e+00 0.000 0.000  
 TCHEB/ 300.000 3000.000 /  
 PCHEB/ 0.010 98.692 /  
 CHEB/ 6 4/  
 CHEB/ 7.385e+00 -1.138e-01 -7.213e-02 -3.391e-02 /  
 CHEB/ 2.581e+00 1.180e-01 7.341e-02 3.327e-02 /  
 CHEB/ 2.769e-01 3.916e-03 3.908e-03 3.086e-03 /  
 CHEB/ 9.439e-02 -3.700e-03 -2.418e-03 -1.158e-03 /  
 CHEB/ 3.067e-02 -5.338e-03 -3.313e-03 -1.496e-03 /  
 CHEB/ 8.623e-03 -2.205e-03 -1.464e-03 -7.461e-04 /

**Table S5: Computed rate coefficient – Cantera format**

- equation:  $\text{NH}_3\text{N} \rightleftharpoons \text{N}_2\text{H}_3$   
type: Chebyshev  
temperature-range: [300.0, 3000.0]  
pressure-range: [0.01 atm, 98.692 atm]  
data:
  - [3.16388, 2.61065, -0.112489, -0.0337218]
  - [2.50571, 1.02858, 0.0409628, 0.0174905]
  - [-0.433864, 0.165908, 0.00619432, -0.00383321]
  - [-0.42413, -0.00183502, 0.020043, 0.00578384]
  - [-0.147488, -0.000229917, 0.00373979, 0.00231388]
  - [-0.0444144, -0.00183023, -0.0013652, -0.000668957]
  
- equation:  $\text{N}_2\text{H}_3 \rightleftharpoons \text{N}_2\text{H}_2 + \text{H}$   
type: Chebyshev  
temperature-range: [300.0, 3000.0]  
pressure-range: [0.01 atm, 98.692 atm]  
data:
  - [-6.79362, 0.813487, -0.140865, 0.0133607]
  - [14.8198, 0.820276, 0.00147819, -0.02546]
  - [-0.591313, 0.239502, 0.0625767, -0.0016977]
  - [-0.304886, 0.0320388, 0.024277, 0.00936021]
  - [-0.133801, -0.0135305, -2.01909e-06, 0.00536465]
  - [-0.0490817, -0.015718, -0.00813631, 0.00114971]
  
- equation:  $\text{N}_2\text{H}_2 + \text{H} \rightleftharpoons \text{NH}_3\text{N}$   
type: Chebyshev  
temperature-range: [300.0, 3000.0]  
pressure-range: [0.01 atm, 98.692 atm]  
data:
  - [1.67563, 0.793494, -0.109792, -0.0300104]
  - [6.80705, 1.06652, 0.0433188, 0.0147008]
  - [-0.0113718, 0.115021, 0.0263406, 0.00187797]
  - [-0.197575, -0.0146724, 0.020278, 0.00686065]
  - [-0.0610285, -0.00638315, 0.00118585, 0.000843304]
  - [-0.0236698, -0.00743267, -0.0014863, -0.0004882]
  
- equation:  $\text{H}_2\text{NN} + \text{H} \rightleftharpoons \text{N}_2\text{H}_3$   
type: Chebyshev  
temperature-range: [300.0, 3000.0]  
pressure-range: [0.01 atm, 98.692 atm]  
data:
  - [5.82128, 1.70499, -0.138129, -0.0437853]
  - [2.38238, 0.314136, 0.12583, 0.0304666]
  - [-0.205892, -0.0239878, 0.0143943, 0.0132256]
  - [-0.162448, 0.0105579, -0.00081423, -4.77164e-05]
  - [-0.0562824, -0.00841372, -0.00327293, -0.00114856]
  - [-0.0134511, -0.00559213, -0.00304685, -0.00101281]



```

- equation: NNH + H2 <=> N2H3
  type: Chebyshev
  temperature-range: [300.0, 3000.0]
  pressure-range: [0.01 atm, 98.692 atm]
  data:
  - [-22.0959, 1.84287, -0.0943889, -0.0410579]
  - [24.257, 0.149232, 0.084957, 0.0337131]
  - [-0.22798, 0.00610311, 0.0089977, 0.00708328]
  - [-0.116055, 0.00598474, 0.00211131, 0.000443531]
  - [-0.0330573, -0.0065871, -0.00322671, -0.00107268]
  - [-0.00428807, -0.00368917, -0.00245024, -0.00108896]

- equation: NH2 + NH <=> N2H3
  type: Chebyshev
  temperature-range: [300.0, 3000.0]
  pressure-range: [0.01 atm, 98.692 atm]
  data:
  - [10.8963, 1.96064, -0.0264904, -0.0138879]
  - [-1.325, 0.046248, 0.0308719, 0.0159473]
  - [-0.45446, -0.00493753, -0.00297691, -0.00123863]
  - [-0.181784, -0.00197523, -0.00140519, -0.000806267]
  - [-0.0668559, -0.000388914, -0.000286631, -0.000173789]
  - [-0.0179225, -9.77336e-05, -6.81701e-05, -3.80433e-05]

- equation: H2NN + H <=> NH3N
  type: Chebyshev
  temperature-range: [300.0, 3000.0]
  pressure-range: [0.01 atm, 98.692 atm]
  data:
  - [7.46678, 1.48735, -0.116947, -0.021797]
  - [2.22624, 0.591241, 0.0774315, -0.00323253]
  - [-0.0462719, -0.0883901, 0.0377971, 0.0212973]
  - [-0.17091, 0.00198697, 0.00400741, 0.00334449]
  - [-0.0589584, 0.00718057, -0.00534685, -0.00148418]
  - [-0.00675005, -0.00814075, -0.00326095, -0.000859941]

- equation: NNH + H2 <=> NH3N
  type: Chebyshev
  temperature-range: [300.0, 3000.0]
  pressure-range: [0.01 atm, 98.692 atm]
  data:
  - [-20.8027, 1.7952, -0.0840762, -0.03411]
  - [24.4864, 0.223914, 0.0625927, 0.0216257]
  - [-0.11247, -0.0442865, 0.0225439, 0.0115299]
  - [-0.141364, 0.0366818, -0.0019349, 0.000652662]
  - [-0.0161265, -0.0157076, 9.47483e-06, -0.000676522]
  - [0.000194453, -0.0022468, -0.00332929, -0.00105985]

```

```

- equation: NH2 + NH <=> NH3N
  type: Chebyshev
  temperature-range: [300.0, 3000.0]
  pressure-range: [0.01 atm, 98.692 atm]
  data:
  - [7.42567, 1.58331, -0.184293, -0.0414146]
  - [-0.0380814, 0.41113, 0.164849, 0.0256187]
  - [-0.147375, 0.025174, 0.0247136, 0.0133207]
  - [-0.090654, -0.00893325, -0.000960061, 0.00242247]
  - [-0.0265349, -0.0121359, -0.00524925, -0.000696434]
  - [3.96188e-05, -0.00744489, -0.00382456, -0.0010807]

- equation: H2NN + H <=> N2H2 + H
  type: Chebyshev
  temperature-range: [300.0, 3000.0]
  pressure-range: [0.01 atm, 98.692 atm]
  data:
  - [8.96391, -0.256048, -0.127045, -0.0423262]
  - [3.58104, 0.282612, 0.124911, 0.0344487]
  - [0.208066, -0.0215834, 0.00929785, 0.0109161]
  - [0.0132221, 0.00470197, -0.00265771, -0.0013656]
  - [0.00850942, -0.00962534, -0.00420432, -0.00163438]
  - [0.00401625, -0.00484242, -0.00302727, -0.00112655]

- equation: NNH + H2 <=> N2H2 + H
  type: Chebyshev
  temperature-range: [300.0, 3000.0]
  pressure-range: [0.01 atm, 98.692 atm]
  data:
  - [-18.8485, -0.141515, -0.0866854, -0.0384681]
  - [25.4015, 0.140872, 0.0829846, 0.0345801]
  - [0.186062, 0.00580615, 0.00740807, 0.00573263]
  - [0.0575937, 0.00161044, 0.000124488, -0.000371364]
  - [0.0294662, -0.00696965, -0.0038192, -0.00148802]
  - [0.0124894, -0.00349695, -0.00235714, -0.00107936]

- equation: NH2 + NH <=> N2H2 + H
  type: Chebyshev
  temperature-range: [300.0, 3000.0]
  pressure-range: [0.01 atm, 98.692 atm]
  data:
  - [13.8669, -0.0377532, -0.025426, -0.0133332]
  - [-0.177674, 0.0454564, 0.0303814, 0.0157223]
  - [-0.0291851, -0.00552477, -0.00338661, -0.00147392]
  - [-0.0104781, -0.00209585, -0.00149409, -0.000860035]
  - [-0.00357322, -0.000355265, -0.000264803, -0.000161025]
  - [-0.000780331, -4.76315e-05, -3.3424e-05, -1.82459e-05]

```

```
- equation: NNH + H2 <=> H2NN + H
type: Chebyshev
temperature-range: [300.0, 3000.0]
pressure-range: [0.01 atm, 98.692 atm]
data:
- [-19.4654, -0.0960863, -0.060614, -0.0281763]
- [25.8604, 0.0933606, 0.057613, 0.0255876]
- [0.297073, 0.00975681, 0.00732958, 0.00447352]
- [0.100684, -0.00245421, -0.00145365, -0.000560436]
- [0.0366116, -0.00510073, -0.003167, -0.00142605]
- [0.0142376, -0.00247607, -0.0016218, -0.000807675]

- equation: NH2 + NH <=> H2NN + H
type: Chebyshev
temperature-range: [300.0, 3000.0]
pressure-range: [0.01 atm, 98.692 atm]
data:
- [8.08802, -0.169537, -0.0993812, -0.0403407]
- [2.01388, 0.186616, 0.105424, 0.0394484]
- [0.315592, -0.00622597, 0.00103591, 0.00413535]
- [0.0915501, -0.0057768, -0.00392886, -0.0017811]
- [0.0288829, -0.0062832, -0.00377236, -0.00163368]
- [0.00837929, -0.00248084, -0.00164509, -0.000832312]

- equation: NH2 + NH <=> NNH + H2
type: Chebyshev
temperature-range: [300.0, 3000.0]
pressure-range: [0.01 atm, 98.692 atm]
data:
- [7.38528, -0.113782, -0.072126, -0.0339128]
- [2.58064, 0.117989, 0.0734149, 0.0332713]
- [0.276905, 0.00391617, 0.00390784, 0.00308579]
- [0.0943856, -0.00369953, -0.00241765, -0.00115756]
- [0.0306732, -0.00533849, -0.00331256, -0.0014962]
- [0.00862349, -0.00220524, -0.0014645, -0.000746124]
```

**Geometry comparisons:**

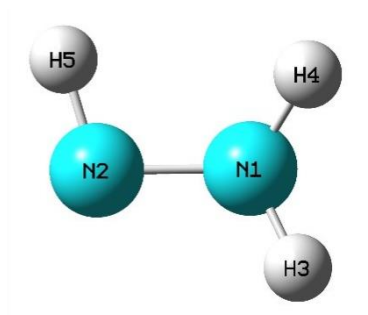

**Fig. S3:** 3D representation of  $N_2H_3$ , the geometry is identical to that shown in Fig. 3A, atom indices were added to give context to the parameters in Table S6.

**Table S6:** Comparison of internal coordinates for the  $N_2H_3$  geometry at two levels of theory, distances ( $r$ ) are in Å, angles ( $a$ ) and dihedral angles ( $d$ ) are in degrees.

| Description | Value CCSD | Value B2PLYP-D3 |
|-------------|------------|-----------------|
| rNN         | 1.354      | 1.348           |
| rNH3        | 1.015      | 1.006           |
| rNH4        | 1.019      | 1.10            |
| rNH5        | 1.031      | 1.020           |
| aNNH3       | 112.532    | 113.832         |
| aNNH4       | 118.904    | 120.487         |
| aNNH5       | 105.272    | 105.999         |
| aH3N1H5     | 113.715    | 115.002         |
| dH5NNH3     | 165.572    | 167.485         |
| dH5NNH4     | 29.982     | 24.687          |

RMSD between the two methods in Table S6: 0.013.

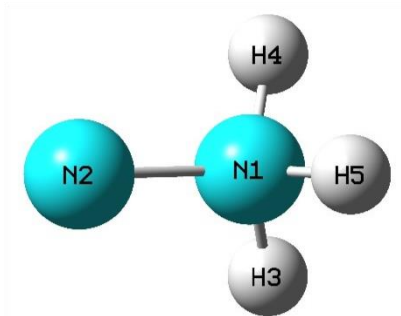

**Fig. S4:** 3D representation of  $\text{NH}_3\text{N}$ , the geometry is identical to that shown in Fig. 3B, atom indices were added to give context to the parameters in Table S7.

**Table S7: Comparison of internal coordinates for the  $\text{NH}_3\text{N}$  geometry at two levels of theory, distances (r) are in Å, angles (a) and dihedral angles (d) are in degrees.**

| Description | Value CCSD | Value B2PLYP-D3 |
|-------------|------------|-----------------|
| rNN         | 1.482      | 1.462           |
| rNH3        | 1.031      | 1.026           |
| rNH4        | 1.031      | 1.026           |
| rNH5        | 1.028      | 1.021           |
| aNNH3       | 113.867    | 114.612         |
| aNNH4       | 113.864    | 114.162         |
| aNNH5       | 106.714    | 106.595         |
| aH3N1H5     | 106.831    | 106.721         |
| aH4N1H5     | 106.831    | 106.721         |
| aH4N1H3     | 108.262    | 107.693         |

RMSD between the two methods in Table S7: 0.305.

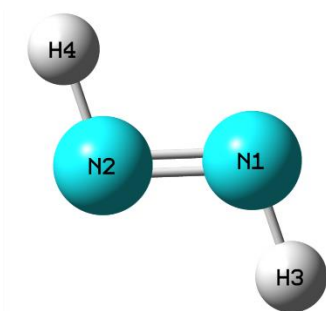

**Fig. S5:** 3D representation of  $t\text{-N}_2\text{H}_2$ , atom indices were added to give context to the parameters in Table S8.

**Table S8: Comparison of internal coordinates for the  $t\text{-N}_2\text{H}_2$  geometry at two levels of theory, distances (r) are in Å, angles (a) and dihedral angles (d) are in degrees.**

| Description | Value experimental <sup>3</sup> | Value B2PLYP-D3 |
|-------------|---------------------------------|-----------------|
| rNN         | 1.252                           | 1.243           |
| rNH         | 1.028                           | 1.030           |
| aHNN        | 106.850                         | 106.685         |
| dHNNH       | 180.000                         | 180.000         |

RMSD between the two methods in Table S8: 0.305.

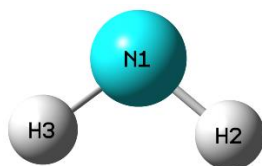

**Fig. S6:** 3D representation of NH<sub>2</sub>, atom indices were added to give context to the parameters in Table S9.

**Table S9:** Comparison of internal coordinates for the NH<sub>2</sub> geometry at two levels of theory, distances (r) are in Å, angles (a) and dihedral angles (d) are in degrees.

| Description | Value experimental <sup>3</sup> | Value B2PLYP-D3 |
|-------------|---------------------------------|-----------------|
| rNH         | 1.024                           | 1.0243          |
| aHNN        | 103.400                         | 103.334         |

RMSD between the two methods in Table S9: 0.066.

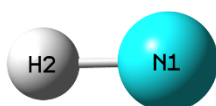

**Fig. S7:** 3D representation of NH<sub>2</sub>, atom indices were added to give context to the parameters in Table S10.

**Table S10:** Comparison of internal coordinates for the NH<sub>2</sub> geometry at two levels of theory, distances (r) are in Å, angles (a) and dihedral angles (d) are in degrees.

| Description | Value experimental <sup>3</sup> | Value B2PLYP-D3 |
|-------------|---------------------------------|-----------------|
| rNH         | 1.036                           | 1.036           |

RMSD between the two methods in Table S10: 0.000.

The  $\text{N}_2\text{H}_3 \rightleftharpoons \text{H}_2\text{NN} + \text{H}$  reaction pathway:

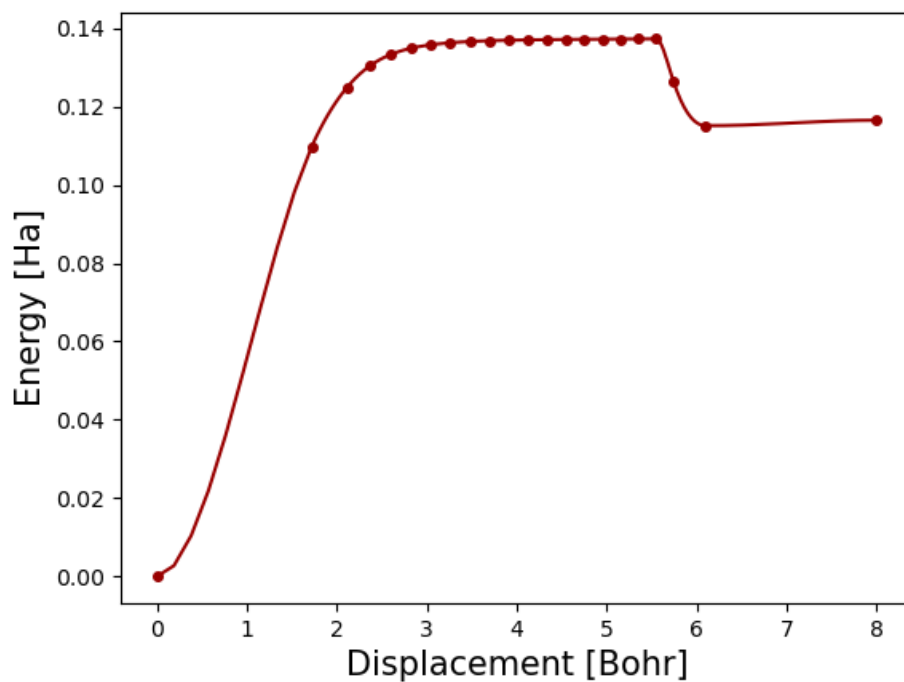

**Fig. S8:** Nudged Elastic Band (NEB) results executed in Orca of  $\text{N}_2\text{H}_3 \rightleftharpoons \text{H}_2\text{NN}(\text{S}) + \text{H}$  reaction coordinate at the NEVPT2 (3,3) level of theory, energy units are Hartree

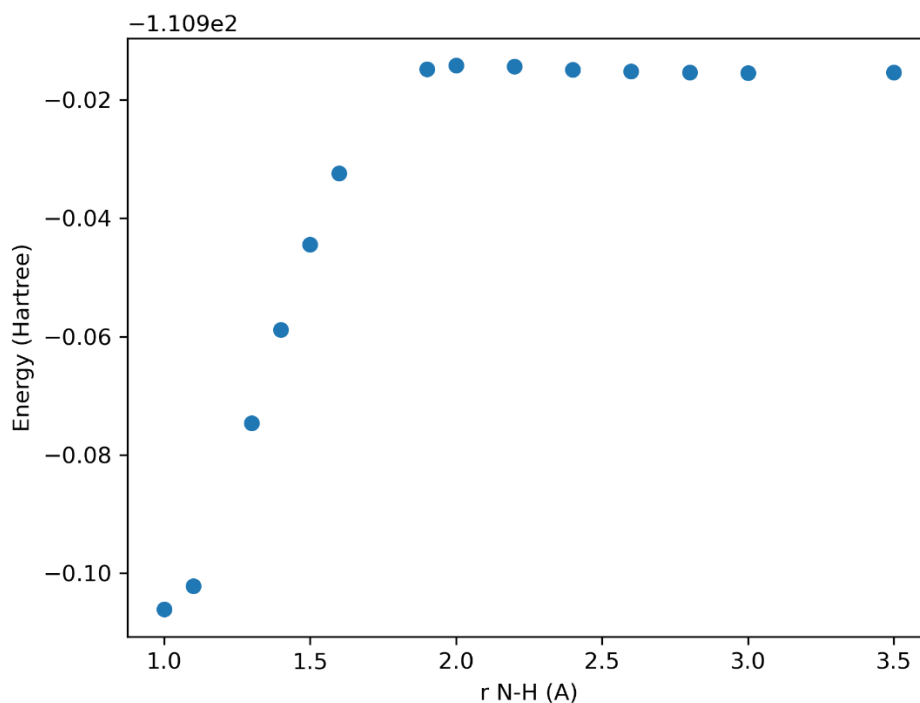

**Fig. S9:** A reaction coordinate scan of N-H distance for  $\text{H}_2\text{NN}(\text{S})$  and H radical performed at MRCI/cc-pVTZ level of theory using Molpro.

**Estimated reaction rate uncertainty based on computed energies:**

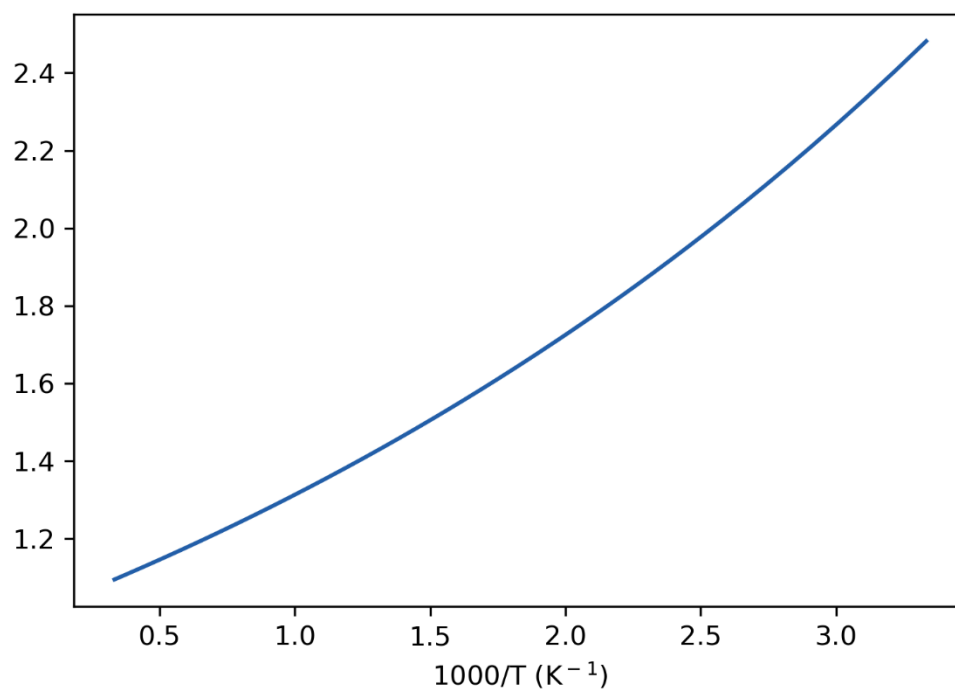

**Fig. S10:** The rate coefficient uncertainty vs. inverse temperature introduced to the high-pressure limit of computed reactions. The uncertainty was computed as  $e^{2\sigma/RT}$  where  $\sigma = \pm 2.3_{kJ/mol}$  is the standard deviation of E0 of all computed species on the N<sub>2</sub>H<sub>3</sub> PES vs. the respective H0 from ATcT.



**Table S11: Comparison of computed B2PLYP-D3/aug-cc-pVTZ frequencies (scaled by a factor of 0.995) vs. experimental values taken from CCCBDB.<sup>3</sup>**

|                                         |                  | Vibrational frequencies, cm <sup>-1</sup> |             |             |             |             |             |
|-----------------------------------------|------------------|-------------------------------------------|-------------|-------------|-------------|-------------|-------------|
| <b>Trans-N<sub>2</sub>H<sub>2</sub></b> | Exp. freq.       | 1289                                      | 1316        | 1529        | 1583        | 3058        | 3120        |
|                                         | Scaled DFT freq. | 1335                                      | 1347        | 1559        | 1617        | 3259        | 3293        |
|                                         | <b>Deviation</b> | <b>3.6%</b>                               | <b>2.3%</b> | <b>1.9%</b> | <b>2.2%</b> | <b>6.6%</b> | <b>5.5%</b> |
| <b>H<sub>2</sub>NN(S)</b>               | Exp. freq.       | 1003                                      | 1288        | 1574        | 1645        | 2805        | 2862        |
|                                         | Scaled DFT freq. | 1007                                      | 1324        | 1593        | 1726        | 3062        | 3069        |
|                                         | <b>Deviation</b> | <b>0.4%</b>                               | <b>2.8%</b> | <b>1.2%</b> | <b>4.9%</b> | <b>9.2%</b> | <b>7.2%</b> |
| <b>NH<sub>2</sub></b>                   | Exp. freq.       | 1479                                      | 3219        | 3301        |             |             |             |
|                                         | Scaled DFT freq. | 1533                                      | 3375        | 3470        |             |             |             |
|                                         | <b>Deviation</b> | <b>3.7%</b>                               | <b>4.9%</b> | <b>5.1%</b> |             |             |             |
| <b>NH</b>                               | Exp. freq.       | 3283                                      |             |             |             |             |             |
|                                         | Scaled DFT freq. | 3296                                      |             |             |             |             |             |
|                                         | <b>Deviation</b> | <b>0.4%</b>                               |             |             |             |             |             |

**References:**

- [1] Putikam Raghunath and N.T. Nghia and Ming-Chang Lin, Advances in Quantum Chemistry 2014, 69, 253-301. Doi: 10.1016/B978-0-12-800345-9.00007-6
- [2] Diévert, Pascal and Catoire, Laurent, The Journal of Physical Chemistry A 2020, 124(30), 6214-6236. DOI: 10.1021/acs.jpca.0c03144
- [3] NIST Computational Chemistry Comparison and Benchmark Database, NIST Standard Reference Database Number 101 Release 22, May 2022, Editor: Russell D. Johnson III <http://cccbdb.nist.gov/>
